# Supplementary material for: Embedding Relational Philosophy in Socio-Hydrology: An ABM-LLM Prototype of Hydrosocial Territories and Compensation Dynamics
Source: Research Square preprint supplement (doi:10.21203/rs.3.rs-6605160/v1), 2025-05-20
Supplement: Supplementary file 1 [file 6855c1e2515c9ad0bc27470d.xlsx]

## Sheet: Sheet1
References	Amazon Country	Year	Context	Traditional groups	Comments About Compensation	Social Impacts	Ecological Impacts
Velastegui-Montoya, A., de Lima, A., & Herrera-Matamoros, V. (2022). What Is the Socioeconomic Impact of the Tucuruí Dam on Its Surrounding Municipalities?. Sustainability, 14(3), 1630.	Brazil	2022	Construction of hydroelectric dams	Indigenous communities/Traditional local communities	Municipalities affected received compensation, but just one used to buffer the impact	Population dynamics/Displacement/City expansion/Economic development/Cultural transformation/Labor/Market transformation/Conflicts/Life quality indicators	Deforestation/Biodiversity loss/Ecosystem change/Greenhouse gas emissions
Velastegui-Montoya, A., Lima, A. D., & Adami, M. (2022). Space-Time Dynamics of Land Use in the Municipality of Goianésia Do Pará, Brazil. ISPRS International Journal of Geo-Information, 11(2), 146.	Brazil	2022	Use of hydropower	Indigenous communities	Not reported	Displacement/Acess to resources/Migration/Land grabbing/Cultural transformation/Health risk	Deforestation/Flood/Ecosystem change/Ecosystem services/Greenhouse gas emissions/Habitat destruction/Biodiversity loss
Souza-Cruz-Buenaga, F. V. A., Espig, S. A., Castro, T. L. C., & Santos, M. A. (2018). Environmental impacts of a reduced flow stretch on hydropower plants. Brazilian Journal of Biology, 79(3), 470-487.	Brazil	2019	Construction of hydroelectric dams	Traditional local communities	Not reported	Displacement/Cultural transformation/Conflicts	Deforestation/Ecosystem change/Habitat destruction/Alteration of river flows/Biodiversity loss/Greenhouse gas emissions/Water quality
Kahn, J. R., Freitas, C. E., & Petrere, M. (2014). False shades of green: The case of Brazilian Amazonian hydropower. Energies 7: 6063–6082.	Brazil	2014	Construction of hydroelectric dams	Indigenous communities	Should have compensation	Displacement/Cultural transformation/Conflicts	Ecosystem services/Greenhouse gas emissions/Biodiversity loss/Deforestation/Flood/Alteration of river flows/Ecosystem change/Water quality
Ferreira, L. V., Cunha, D. A., Chaves, P. P., Matos, D. C., & Parolin, P. (2013). Impacts of hydroelectric dams on alluvial riparian plant communities in eastern Brazilian Amazonian. Anais da Academia Brasileira de Ciências, 85(3), 1013-1023.	Brazil	2013	Construction of hydroelectric dams	Traditional local communities	Need for environmental compensation measures and the formulation of management and conservation plans to mitigate the impacts of hydropower	Displacement/Cultural transformation/Conflicts	Deforestation/Flood/Biodiversity loss/Habitat destruction/Hydrological cycle/Water quality/Alteration of river flows/Ecosystem change
Forsberg, B. R., Melack, J. M., Dunne, T., Barthem, R. B., Goulding, M., Paiva, R. C., ... & Weisser, S. (2017). The potential impact of new Andean dams on Amazon fluvial ecosystems. PloS one, 12(8), e0182254.	Peru/Bolivia	2017	Construction of hydroelectric dams	Not reported	Not reported	Health risk/Displacement/Cultural transformation/Conflicts	Mercury contamination/Fish population/Water quality/Greenhouse gas emissions/Flood/Ecosystem change/Biodiversity loss/Deforestation/Habitat destruction
Alho, C. J., Reis, R. E., & Aquino, P. P. (2015). Amazonian freshwater habitats experiencing environmental and socioeconomic threats affecting subsistence fisheries. Ambio, 44, 412-425.	Brazil	2015	Use of hydropower	Traditional local communities	Not reported	Productive activities/Acess to resources/Displacement/Cultural transformation/Conflicts	Biodiversity loss/Ecosystem change/Deforestation/Hydrological cycle/Fish population/Habitat destruction/Water quality
Fearnside, P. M. (2015). Amazon dams and waterways: Brazil’s Tapajós Basin plans. Ambio, 44, 426-439.	Brazil	2015	Construction of hydroelectric dams	Indigenous communities	Lack of adequate compensation	Displacement/Cultural transformation/Conflicts	Deforestation/Ecosystem change/Biodiversity loss/Greenhouse gas emissions/Fish population/Mercury contamination/Flood
de Araújo, K. R., Sawakuchi, H. O., Bertassoli Jr, D. J., Sawakuchi, A. O., da Silva, K. D., Vieira, T. B., ... & Pereira, T. S. (2019). Carbon dioxide (CO 2) concentrations and emission in the newly constructed Belo Monte hydropower complex in the Xingu River, Amazonia. Biogeosciences, 16(18), 3527-3542.	Brazil	2019	Use of hydropower	Not reported	Not reported	Not reported	Greenhouse gas emissions/Water quality/Alteration of river flows
Moran, E. F. (2020). Changing how we build hydropower infrastructure for the common good: lessons from the Brazilian Amazon. Civitas-Revista de Ciências Sociais, 20, 5-15.	Brazil	2020	Construction of hydroelectric dams	Traditional local communities	Should have improvements in the approval, construction, and operation processes of hydropower dams could lead to better outcomes for society, implying that compensation or mitigation measures may be necessary	Displacement/Resettlement/Cultural transformation/Conflicts	Alteration of river flows/Deforestation/Biodiversity loss/Ecosystem change/Greenhouse gas emissions
Santos, R. E., Pinto-Coelho, R. M., Drumond, M. A., Fonseca, R., & Zanchi, F. B. (2020). Damming Amazon Rivers: Environmental impacts of hydroelectric dams on Brazil’s Madeira River according to local fishers’ perception. Ambio, 49(10), 1612-1628.	Brazil	2020	Use of hydropower	Traditional local communities	Not reported	Productive activities/Cultural transformation	Hydrological cycle/Fish population/Ecosystem change/Biodiversity loss
Cummings, B. J. (1995). Dam the rivers; damn the people: Hydroelectric development and resistance in Amazonian Brazil. GeoJournal, 35, 151-160.	Brazil	1995	Construction of hydroelectric dams	Traditional local communities	Need for settlement agreements and the demand for cancellation of dam construction	Displacement/Poverty	Deforestation/Water quality/Health risk/Habitat destruction/Hydrological cycle/Ecosystem change
Carvalho, E. G. A., Blanco, C., & Maua, L. M. F. (2020). Decision Support system for hydro power plants in Amazon considering the cost of externalities. International Journal of Energy Economics and Policy, 10(2), 40-47.	Brazil	2019	Use of hydropower	Indigenous communities/Traditional local communities	Need to calculate the externalities caused by the hydropower, including it in the energy production cost to ensure sustainability and feasibility	Conflicts/Productive activities/City expansion/Cultural transformation/Displacement	Ecosystem change/Biodiversity loss/Greenhouse gas emissions/Health risk/Deforestation/Habitat destruction
Progênio, M. F., Blanco, C. J. C., da Silva Cruz, J., da Costa Filho, F. A. M., & Mesquita, A. L. A. (2021). Environmental impact index for tidal power plants in amazon region coast. Environment, Development and Sustainability, 23, 10814-10830.	Brazil	2021	Construction of hydroelectric dams	Traditional local communities	Not reported	Displacement/Cultural transformation/Conflicts	Erosion/Flood/Ecosystem change/Habitat destruction/Biodiversity loss/Alteration of river flows/Water quality/Greenhouse gas emissions/Deforestation
Rode, J., Le Menestrel, M., Van Wassenhove, L., & Simon, A. (2015). Ethical analysis for evaluating sustainable business decisions: the case of environmental impact evaluation in the Inambari hydropower project. Sustainability, 7(8), 10343-10364.	Brazil/Peru	2015	Use of hydropower	Indigenous communities	There may be trade-offs between financial interests and sustainability goals, suggesting that compensation or mitigation measures may be necessary	Ethical/Displacement/Cultural transformation/Conflicts	Flood/Deforestation/Habitat destruction/Alteration of river flows/Biodiversity loss/Ecosystem change/Fish population/Ecosystem services
Sá-Oliveira, J. C., Isaac, V. J., & Ferrari, S. F. (2015). Fish community structure as an indicator of the long-term effects of the damming of an Amazonian river. Environmental Biology of Fishes, 98, 273-286.	Brazil	2014	Construction of hydroelectric dams	Traditional local communities	Not reported	Displacement/Cultural transformation/Conflicts	Fish population/Ecosystem change/Biodiversity loss/Deforestation/Habitat destruction/Greenhouse gas emissions
Nunes, M. U. S., Hallwass, G., & Silvano, R. A. M. (2019). Fishers’ local ecological knowledge indicate migration patterns of tropical freshwater fish in an Amazonian river. Hydrobiologia, 833(1), 197-215.	Brazil	2019	Use of hydropower	Traditional local communities	Not reported	Productive activities/Cultural transformation/Conflicts/Displacement	Fish population/Habitat destruction/Alteration of river flows/Ecosystem change/Deforestation/Biodiversity loss/Greenhouse gas emissions
Sant'anna, I. R. A., de Carvalho Freitas, C. E., Sousa, R. G. C., dos Anjos, H. D. B., & da Costa Doria, C. R. (2020). Fishing production of Pinirampus pirinampu and Brachyplatystoma platynemum catfish has been affected by large dams of the Madeira River (Brazilian amazon). Boletim do Instituto de Pesca, 46(2).	Brazil	2020	Use of hydropower	Traditional local communities	Public policies and measures for the management and sustainable handling of the fishery resource should be implemented urgently to avoid irreversible loss. Public policies and measures for the management and sustainable handling of the fishery resource should be implemented urgently to avoid irreversible loss	Productive activities/Displacement/Cultural transformation/Conflicts	Fish population/Ecosystem change/Deforestation/Habitat destruction/Biodiversity loss/Greenhouse gas emissions/Fish population
Nickerson, S., Chen, G., Fearnside, P. M., Allan, C. J., Hu, T., de Carvalho, L. M., & Zhao, K. (2022). Forest loss is significantly higher near clustered small dams than single large dams per megawatt of hydroelectricity installed in the Brazilian Amazon. Environmental Research Letters, 17(8), 084026.	Brazil	2022	Use of hydropower	Indigenous communities/Traditional local communities	Compensation may be provided to affected communities for the loss of land, livelihoods, and cultural heritage, although the effectiveness and adequacy of such compensation measures can vary	Displacement/Cultural transformation/Conflicts	Deforestation/Alteration of river flows/Biodiversity loss/Ecosystem services/Greenhouse gas emissions
Castro-Diaz, L., Lopez, M. C., & Moran, E. (2018). Gender-differentiated impacts of the Belo Monte hydroelectric dam on downstream fishers in the Brazilian Amazon. Human ecology, 46, 411-422.	Brazil	2018	Use of hydropower	Traditional local communities	Population was not adequately compensated	Cultural transformation/Productive activities	Fish population/Biodiversity loss/Deforestation/Ecosystem change/Habitat destruction/Alteration of river flows/Water quality/Greenhouse gas emissions/Flood
Pereira, G. H. A., Silva, V. F. V., Camara, R., Fréo, V. A., & Pereira, M. G. (2021). Artificial flooding changes soil chemistry and carbon dynamics in upland forests next to hydropower plant in Amazon basin. Environment, Development and Sustainability, 23(5), 7537-7549.	Brazil	2020	Construction of hydroelectric dams	Traditional local communities	Not reported	Displacement/Land use changes/Cultural transformation	Deforestation/Ecosystem change/Flood/Greenhouse gas emissions/Biodiversity loss/Alteration of river flows/Water quality
Severino, W. M. D. S., Santos, E. S. D., & Albuquerque-Cunha, H. F. (2021). Hydropower plant in Eastern Amazon and its impacts on the local population’s eating habits. Revista Ambiente & Água, 16(5), e2700.	Brazil	2021	Construction of hydroelectric dams	Traditional local communities	Population received compensation	Cultural transformation/Productive activities/Displacement	Water quality/Health risk/Biodiversity loss/Flood
Akama, A. (2017). Impacts of the hydroelectric power generation over the fish fauna of the Tocantins River, Brazil: Marabá dam, the final blow. Oecologia Australis, 21(3).	Brazil	2017	Construction of hydroelectric dams	Indigenous communities/Traditional local communities	Should have compensation	Displacement/Cultural transformation/Productive activities	Deforestation/Ecosystem change/Biodiversity loss/Habitat destruction/Alteration of river flows/Water quality
da Silva Oliveira, C. A., Kasper, D., Sargentini Junior, E., Bolson, M. A., Torrezani, L., & Zara, L. F. (2021). Influence of environmental conditions on the mercury levels of the sediment along the Balbina Reservoir, Brazilian Amazon. Environmental Monitoring and Assessment, 193(1), 50.	Brazil	2021	Use of hydropower	Traditional local communities	Not reported	Displacement/Cultural transformation/Conflicts	Biodiversity loss/Mercury contamination/Ecosystem change/Deforestation/Habitat destruction/Alteration of river flows/Water quality
Braz Neto, S. P., Xavier, A. M. D. M., Mesquita, C. R. D., Costa, L. D. A., Reis, F. R. D., Cintra, I. H. A., ... & Bentes, B. (2021). Multidisciplinary approach to identification of fishery systems in amazonian reservoir: case study in Tucuruí Dam. Bol. Inst. Pesca (Impr.), e604-e604.	Brazil	2021	Construction of hydroelectric dams	Traditional local communities	Not reported	Productive activities/Cultural transformation/Displacement/Conflicts	Ecosystem change/Fish population/Deforestation/Biodiversity loss/Greenhouse gas emissions
Mere-Roncal, C., Cardoso Carrero, G., Chavez, A. B., Almeyda Zambrano, A. M., Loiselle, B., Veluk Gutierrez, F., ... & Broadbent, E. N. (2021). Participatory Mapping for Strengthening Environmental Governance on Socio-Ecological Impacts of Infrastructure in the Amazon: Lessons to Improve Tools and Strategies. Sustainability, 13(24), 14048.	Bolívia/Brazil/Colombia/Peru	2021	Construction of hydroelectric dams	Indigenous communities/Traditional local communities	Need for innovative models of governance to mitigate the negative socio-economic and ecological effects of infrastructure development in the Amazon	Conflicts/Land grabbing/Cultural transformation/Displacement/Conflicts	Deforestation/Habitat destruction/Ecosystem change/Biodiversity loss/Greenhouse gas emissions
Guerrero, J. V., Escobar-Silva, E. V., Chaves, M. E., Mataveli, G. A., Bourscheidt, V., De Oliveira, G., ... & Moschini, L. E. (2020). Assessing land use and land cover changes in the direct influence zone of the Braço Norte Hydropower Complex, Brazilian Amazonia. Forests, 11(9), 988.	Brazil	2020	Construction of hydroelectric dams	Indigenous communities/Traditional local communities	The text suggests the need for adopting special policies to minimize the impact of these constructions, such as the creation of protected areas and the definition of locally adjusted parameters for ecological-economic zoning	Displacement/Cultural transformation/Conflicts	Deforestation/Biodiversity loss/Alteration of river flows/Biodiversity loss/Water quality/Greenhouse gas emissions/Fish population
Curtarelli, M., Stech, J., Lorenzzetti, J., Alcântara, E., & Ogashawara, I. (2021). Predicting modeling scenarios of climate change impact on the CO2 emissions from an Amazonian hydroelectric reservoir. Modeling Earth Systems and Environment, 7, 631-639.	Brazil	2021	Construction of hydroelectric dams	Traditional local communities	Not reported	Displacement/Cultural transformation/Conflicts	Greenhouse gas emissions/Deforestation/Habitat destruction/Ecosystem change/Biodiversity loss
Von Randow, R. C. S., Rodriguez, D. A., Tomasella, J., Aguiar, A. P. D., Kruijt, B., & Kabat, P. (2019). Response of the river discharge in the Tocantins River Basin, Brazil, to environmental changes and the associated effects on the energy potential. Regional environmental change, 19, 193-204.	Brazil	2019	Construction of hydroelectric dams	Indigenous communities/Traditional local communities	Not reported	Land use changes/Displacement/Cultural transformation/Conflicts	Greenhouse gas emissions/Alteration of river flows/Deforestation/Hydrological cycle/Biodiversity loss/Ecosystem change/Fish population
Rodrigues-Filho, J. L., Abe, D. S., Gatti-Junior, P., Medeiros, G. R., Degani, R. M., Blanco, F. P., ... & Tundisi, J. G. (2015). Spatial patterns of water quality in Xingu River Basin (Amazonia) prior to the Belo Monte dam impoundment. Brazilian Journal of Biology, 75(3 suppl 1), 34-46.	Brazil	2015	Construction of hydroelectric dams	Indigenous communities/Traditional local communities	Not reported	Conflicts/Displacement/Cultural transformation	Hydrological cycle/Water quality/Alteration of river flows/Ecosystem change/Deforestation/Biodiversity loss/Fish population/Greenhouse gas emissions
Spatial-temporal dynamics and sources of total Hg in a hydroelectric reservoir in the Western Amazon, Brazil	Brazil	2016	Construction of hydroelectric dams	Indigenous communities/Traditional local communities	Compensation may be provided to affected communities for the loss of land, livelihoods, and cultural heritage, although the effectiveness and adequacy of such compensation measures can vary	Health risk/Conflicts/Displacement/Cultural transformation	Ecosystem change/Mercury contamination/Flood/Deforestation/Biodiversity loss/Fish population/Alteration of river flows/Greenhouse gas emissions
Silva, T. R., Medeiros, M. B., Noronha, S. E., & Pinto, J. R. R. (2017). Species distribution models of rare tree species as an evaluation tool for synergistic human impacts in the Amazon rainforest. Brazilian Journal of Botany, 40, 963-971.	Brazil	2017	Construction of hydroelectric dams	Traditional local communities	Not reported	Conflicts/Displacement/Cultural transformation	Deforestation/Flood/Biodiversity loss/Ecosystem change/Habitat destruction/Greenhouse gas emissions
Baird, I. G., Silvano, R. A., Parlee, B., Poesch, M., Maclean, B., Napoleon, A., ... & Hallwass, G. (2021). The downstream impacts of hydropower dams and indigenous and local knowledge: Examples from the Peace–Athabasca, Mekong, and Amazon. Environmental Management, 67, 682-696.	Brazil	2021	Construction of hydroelectric dams	Not reported	Need for appropriate mitigation and compensation for the downstream impacts of dams	Displacement/Cultural transformation	Flood/Water quality/Erosion/Ecosystem change/Habitat destruction/Alteration of river flows/Fish population
Fainguelernt, M. B. (2016). The historical trajectory of the Belo Monte hydroelectric plant's environmental licensing process. Ambiente & Sociedade, 19, 245-264.	Brazil	2016	Use of hydropower	Indigenous communities/Traditional local communities	Protests against decisions made without the participation of affected indigenous peoples, which implies a demand for compensation or fair treatment	Displacement/Cultural transformation/Conflicts	Deforestation/Habitat destruction/Ecosystem change/Biodiversity loss/Greenhouse gas emissions
Hanna, P., Vanclay, F., Langdon, E. J., & Arts, J. (2016). The importance of cultural aspects in impact assessment and project development: reflections from a case study of a hydroelectric dam in Brazil. Impact assessment and project appraIsal, 34(4), 306-318.	Brazil	2016	Use of hydropower	Indigenous communities	Establishment of a compensation program called Procambix, which was a result of pressure from civil society and negotiations between the proponent, licensing institutions, and the Xerente people	Conflicts/Cultural transformation	Not reported
Hacon, S. S., Dórea, J. G., Fonseca, M. D. F., Oliveira, B. A., Mourão, D. S., Ruiz, C. M., ... & Bastos, W. R. (2014). The influence of changes in lifestyle and mercury exposure in riverine populations of the Madeira River (Amazon Basin) near a hydroelectric project. International journal of environmental research and public health, 11(3), 2437-2455.	Brazil	2014	Construction of hydroelectric dams	Traditional local communities	Not reported	Health risk/Displacement/Cultural transformation/Productive activities/Conflicts	Deforestation/Mercury contamination/Health risk/Habitat destruction/Ecosystem change/Biodiversity loss/Greenhouse gas emissions
Doria, C. R. D. C., Athayde, S., Marques, E. E., Lima, M. A. L., Dutka-Gianelli, J., Ruffino, M. L., ... & Isaac, V. N. (2018). The invisibility of fisheries in the process of hydropower development across the Amazon. Ambio, 47(4), 453-465.	Brazil	2017	Construction of hydroelectric dams	Indigenous communities/Traditional local communities	Compensation in a participatory way	Displacement/Productive activities/Cultural transformation/Conflicts	Ecosystem change/Biodiversity loss/Alteration of river flows/Habitat destruction/Fish population/Deforestation/Greenhouse gas emissions/Hydrological cycle
Magalhães, M. G., Moreira, D. A., Furtado, C., & Parente, T. E. (2017). The mitochondrial genome of Hypancistrus zebra (Isbrücker & Nijssen, 1991)(Siluriformes: Loricariidae), an endangered ornamental fish from the Brazilian Amazon. Conservation Genetics Resources, 9, 319-324.	Brazil	2017	Use of hydropower	Indigenous communities/Traditional local communities	Not reported	Displacement/Cultural transformation/Conflicts	Habitat destruction/Fish population/Deforestation/Ecosystem change/Biodiversity loss/Greenhouse gas emissions
Barros, M. D. L. C., & Rosman, P. C. C. (2018). A study on fish eggs and larvae drifting in the Jirau reservoir, Brazilian Amazon. Journal of the Brazilian Society of Mechanical Sciences and Engineering, 40, 1-16.	Brazil	2018	Use of hydropower	Traditional local communities	Compensation as management plan	Productive activities/Displacement/Cultural transformation/Conflicts/Health risk	Fish population/Flood/Ecosystem change/Alteration of river flows/Deforestation/Habitat destruction/Biodiversity loss/Greenhouse gas emissions
Carvalho, T. P. D., Malcher, J. A. S., & Brito, D. M. C. (2023). The Socioenvironmental Perception of the Ones Affected by the Hydroelectric Power Plants Along the AraguariRiver/AP, Eastern Amazon. Ambiente & Sociedade, 26, e02162.	Brazil	2023	Construction of hydroelectric dams	Traditional local communities	Should have compensation for mitigation	Conflicts/Displacement/Productive activities/Cultural transformation	Flood/Biodiversity loss/Deforestation/Water quality/Habitat destruction/Ecosystem change/Greenhouse gas emissions/Fish population/Alteration of river flows
Simões, P. I., Stow, A., Hödl, W., Amézquita, A., Farias, I. P., & Lima, A. P. (2014). The value of including intraspecific measures of biodiversity in environmental impact surveys is highlighted by the Amazonian brilliant-thighed frog (Allobates femoralis). Tropical Conservation Science, 7(4), 811-828.	Brazil	2014	Construction of hydroelectric dams	Indigenous communities/Traditional local communities	Not reported	Displacement/Cultural transformation/Conflicts	Biodiversity loss/Deforestation/Habitat destruction/Ecosystem change/Greenhouse gas emissions
Damme, P. A. V., Córdova-Clavijo, L., Baigún, C., Hauser, M., Doria, C. R. D. C., & Duponchelle, F. (2019). Upstream dam impacts on gilded catfish Brachyplatystoma rousseauxii (Siluriformes: Pimelodidae) in the Bolivian Amazon. Neotropical Ichthyology, 17(4), e190118.	Bolivia	2019	Use of hydropower	Traditional local communities	Not reported	Displacement/Productive activities/Conflicts/Cultural transformation	Habitat destruction/Fish population/Hydrological cycle/Deforestation/Ecosystem change/Water quality/Alteration of river flows/Biodiversity loss/Greenhouse gas emissions
Araújo, M. F. A., De Marco, P., Juen, L., & Tôrres, N. M. (2020). Vulnerability of Phyllocycla Species (Odonata: Gomphidae) to current and planned anthropic activities by the Brazilian Government. Neotropical entomology, 49, 24-32.	Brazil	2020	Construction of hydroelectric dams	Traditional local communities	Not reported	Displacement	Habitat destruction/Biodiversity loss/Deforestation/Alteration of river flows/Greenhouse gas emissions
Schmidt, J., Andrade, P. D. B. D., & Padial, A. A. (2020). Zooplankton trajectory before, during and after a hydropower dam construction. Acta Limnologica Brasiliensia, 32, e18.	Brazil	2020	Use of hydropower	Indigenous communities/Traditional local communities	Not reported	Displacement/Productive activities/Cultural transformation/Conflicts	Ecosystem change/Biodiversity loss/Habitat destruction/Deforestation/Greenhouse gas emissions/Alteration of river flows
Ferreira, L. V., Cunha, D. A., Chaves, P. P., Matos, D. C., & Parolin, P. (2013). Impacts of hydroelectric dams on alluvial riparian plant communities in eastern Brazilian Amazonian. Anais da Academia Brasileira de Ciências, 85(3), 1013-1023.	Brazil	2013	Construction of hydroelectric dams	Traditional local communities	Need for environmental compensation measures and the formulation of management and conservation plans to mitigate the impacts of hydroelectric dams	Displacement/Cultural transformation/Conflicts	Deforestation/Flood/Biodiversity loss/Habitat destruction/Hydrological cycle/Water quality/Alteration of river flows/Greenhouse gas emissions/Ecosystem change/Hydrological cycle
Schmutz, R. (2023). Infrastructure-driven development: the local social impact of a large hydropower plant in the Amazon. The Journal of Development Studies, 59(8), 1123-1143.	Brazil	2023	Use of hydropower	Indigenous communities/Traditional local communities	Not reported	Displacement/Cultural transformation/Conflicts	Biodiversity loss/Deforestation/Habitat destruction/Ecosystem change/Greenhouse gas emissions/Flood
Finer, M., & Jenkins, C. N. (2012). Proliferation of hydroelectric dams in the Andean Amazon and implications for Andes-Amazon connectivity. Plos one, 7(4), e35126.	Peru/Ecuador/Bolivia/Colombia	2012	Construction of hydroelectric dams	Indigenous communities/Traditional local communities	Not reported	Displacement/Cultural transformation	Alteration of river flows/Deforestation/Flood/Biodiversity loss/Habitat destruction/Greenhouse gas emissions/Ecosystem change
