# Supplementary material for: Embedding Relational Philosophy in Socio-Hydrology: An ABM-LLM Prototype of Hydrosocial Territories and Compensation Dynamics
Source: Research Square preprint supplement (doi:10.21203/rs.3.rs-6605160/v1), 2025-05-20
Supplement: Supplementary file 2 [file 68e318dca65de249a9007c9d.docx]

**Results Literature Review**

In the analysis of the selected papers, it was observed that out of the 47 papers reviewed, a total of 55 HPP cases across various Amazon countries were investigated. Brazil emerged as the predominant focus, with 44 cases representing 80% of the total cases. This result indicates that some papers examined the socio-environmental impacts of hydropower plants in more than one Amazonian country. The distribution across other Amazonian countries is as follows: Bolivia accounted for 4 cases (~7%), Colombia and Peru each contributed 2 cases (~4% each), while Ecuador had 1 case (~2%).

**Graph 2:** Number of papers published per year

The analysis of the publication years of the selected papers provides a temporal perspective on the scholarly attention given to the socio-environmental impacts of hydropower plants in the Amazon region. The distribution of papers across the years reveals a gradual growth in research output. The earliest paper identified dates back to 1995, signifying an early interest in the subject. However, it is notable that a more substantial influx of publications occurred from 2012 onward. The years 2019, 2020, and 2021 stand out with a combined total of 20 papers (~43%), indicating a concentrated period of scholarly activity. This clustering suggests an increasing recognition of the importance of understanding the complex dynamics surrounding hydropower development in the Amazon region. The relatively lower numbers in 2018, 2022, and 2023 may indicate potential gaps or fluctuations in research attention during these specific years. Overall, this temporal analysis provides insights into the evolving academic discourse surrounding the socio-environmental impacts of hydropower in the Amazon, reflecting a growing awareness and commitment to exploring this topic.

The analysis of the contextual focus in the selected papers sheds light on the varied dimensions of the socio-environmental impacts associated with hydropower plants in the Amazon region. Most of the papers, totaling 29 (~62%), focused on the construction phase of hydroelectric dams. This emphasis underscores the recognition of the transformative and often disruptive effects that dam construction can have on local ecosystems, communities, and traditional ways of life. Additionally, 18 papers (~38%) delved into the broader context of hydropower utilization, exploring the ongoing consequences and implications once hydropower plants are operational. This dual focus on both the construction and utilization phases reflects a comprehensive approach to understanding the multifaceted impacts, encompassing not only the immediate effects during construction but also the enduring consequences of hydropower plants on the socio-environmental fabric of the Amazon region. The distribution across these two contextual categories provides a nuanced understanding of the diverse aspects of impact that researchers have explored within the selected literature.

The extensive focus on traditional and Indigenous communities within the selected papers highlights the acute attention given to understanding the impacts of hydropower plants on these groups in the Amazon region. 44 (~94%) of the 47 reviewed papers specifically addressed the repercussions of hydropower development on traditional or Indigenous communities. This emphasis underscores a shared concern among researchers regarding the potential socio-environmental disruptions experienced by these groups.

The diverse range of social impacts documented in the selected papers reveals the intricate web of challenges associated with hydropower development in the Amazon region. Specifically, 36 papers (~77%) reviewed highlighted cases of socio-environmental conflicts, reflecting the complex interplay of interests and tensions arising from hydropower plants. Cultural transformation emerges as a significant theme, with 44 papers (~94%) highlighting the profound and often irreversible changes experienced by local communities in the face of these developments. Displacement, a critical concern in large-scale infrastructure projects, is depicted in 43 papers (~91%), underscoring the widespread impact on community livelihoods and social structures. Health risks, though less frequently addressed, are nonetheless highlighted by 5 papers (~11%), pointing to the potential consequences for the well-being of affected populations. Finally, 15 papers (~32%) shed light on the impacts of hydropower plants on productive activities, emphasizing the disruption to local economies and traditional ways of sustaining livelihoods.

The analysis of environmental impact cases within the selected papers underscores the multifaceted consequences of hydropower projects in the Amazon region. Alteration of river flows, cited in 26 papers (~55%), signifying the widespread recognition of the transformative effects on aquatic ecosystems. Biodiversity loss was also a significant concern, reflected in 43 papers (~91%), emphasizing the implications for the rich and diverse Amazonian flora and fauna. Deforestation, documented in 42 papers (~89%), and habitat destruction, noted in 32 paper (~68%), point to the alterations in aquatic and terrestrial landscapes. Additionally, the papers acknowledged the far-reaching consequences of HPP on the hydrological cycle (9 papers, ~19%), water quality (19 papers, ~40%), and greenhouse gas emissions (37 papers, 79%).

Examining compensation mechanisms within the reviewed papers reveals a notable divergence in the discourse surrounding the socio-environmental impacts of HPP in the Amazon region. Of the 47 papers, 21 (~45%) explicitly discussed the necessity for compensation or critiqued the adequacy of existing compensation measures in addressing the identified impacts. These papers underscored the ongoing concern within the academic community about the need for adequate compensation mechanisms to address the multifaceted consequences of HPP. Conversely, 24 papers (~51%) did not explicitly mention compensation for the impacts discussed, signaling potential gaps or limited attention to this aspect in the examined literature. Only two papers (~4%) highlighted instances where compensation was acknowledged as implemented without negative repercussions, suggesting that successful compensation practices remain relatively rare in HPP in Amazon.
